# Supplementary material for: Selective interface transparency in graphene nanoribbon based molecular junctions
Source: Royal Society of Chemistry journal article supplement (doi:10.1039/c7nr08564h), 2018-01-01
Supplement: c7nr08564h1.pdf [file c7nr08564h1.pdf]

# Selective interface transparency in graphene nanoribbon based molecular junctions

K. P. Dou,<sup>a,b,c</sup> C. C. Kaun<sup>c,d</sup> and R. Q. Zhang<sup>a,e</sup>

<sup>a</sup> *Department of Physics, City University of Hong Kong, Hong Kong SAR, China*

<sup>b</sup> *College of Information Science and Engineering, Ocean University of China, Qingdao 266100, China*

<sup>c</sup> *Research Center for Applied Sciences, Academia Sinica, Taipei 11529, Taiwan*

<sup>d</sup> *Department of Physics, National Tsing-Hua University, Hsinchu 30013, Taiwan*

<sup>e</sup> *Beijing Computational Science Research Center, Beijing 100193, P. R. China*

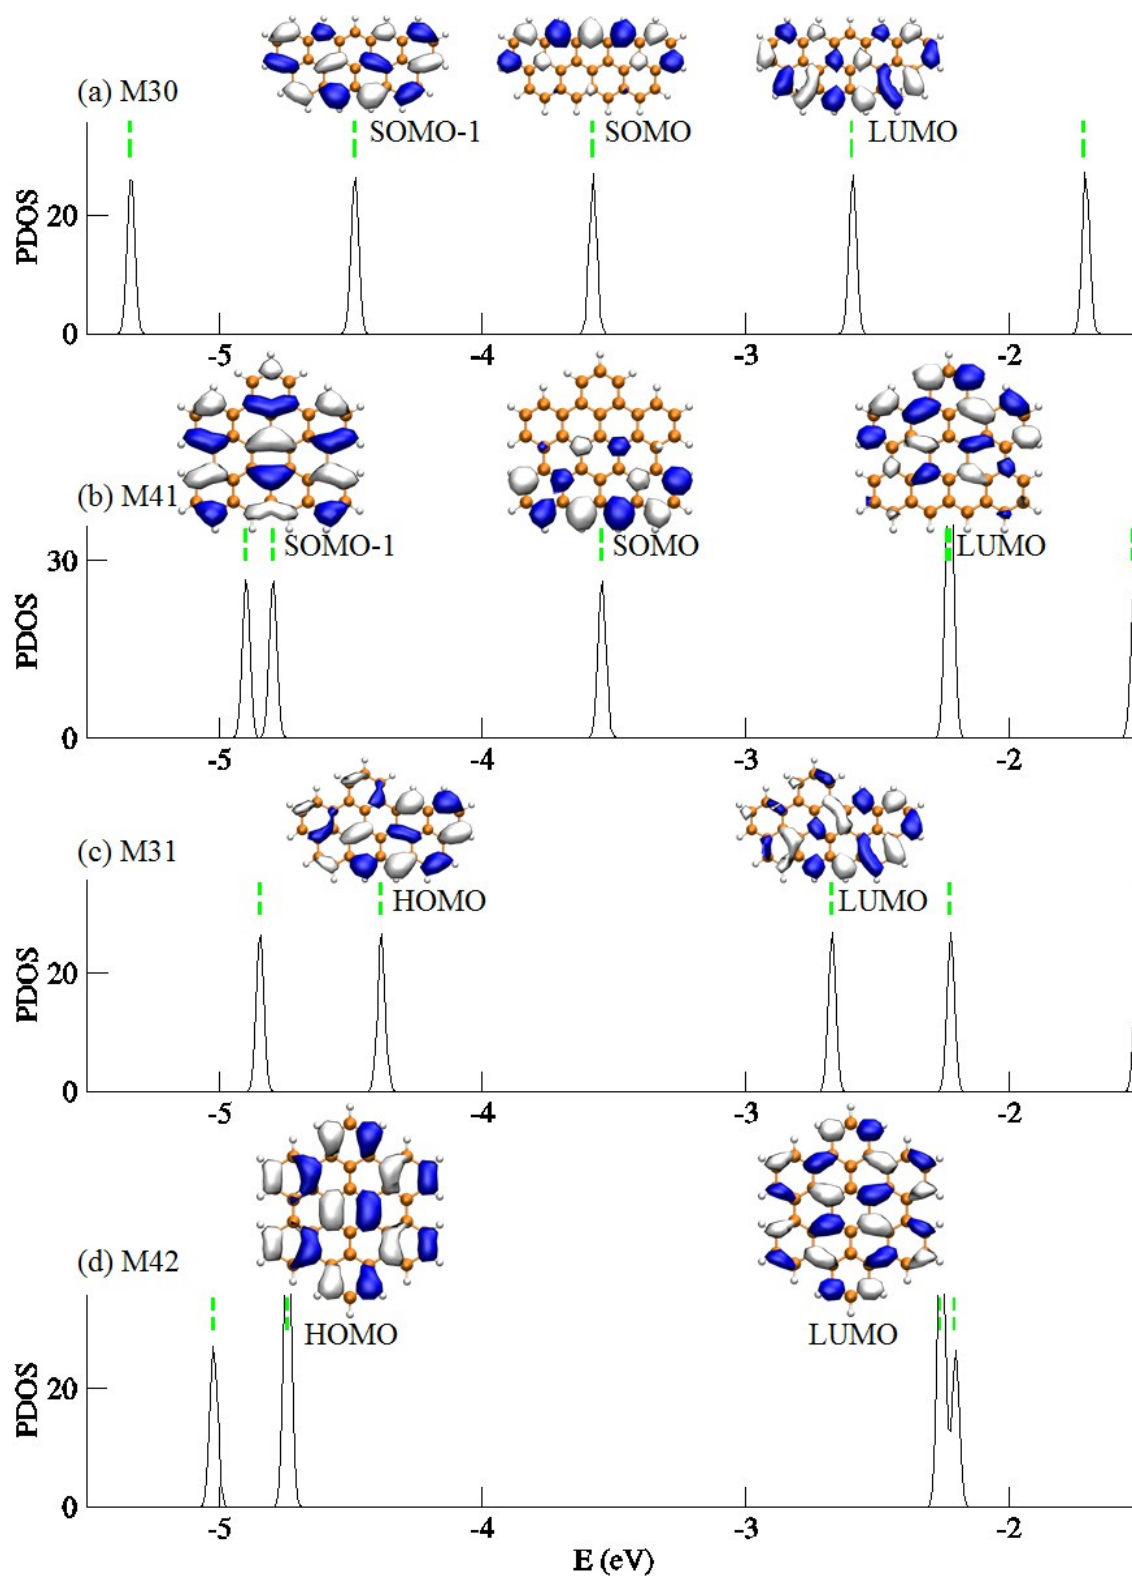

Fig. S1 Projected density of states for isolated M30, M41, M31 and M42. Selected orbital functions are shown at the top of each panel.

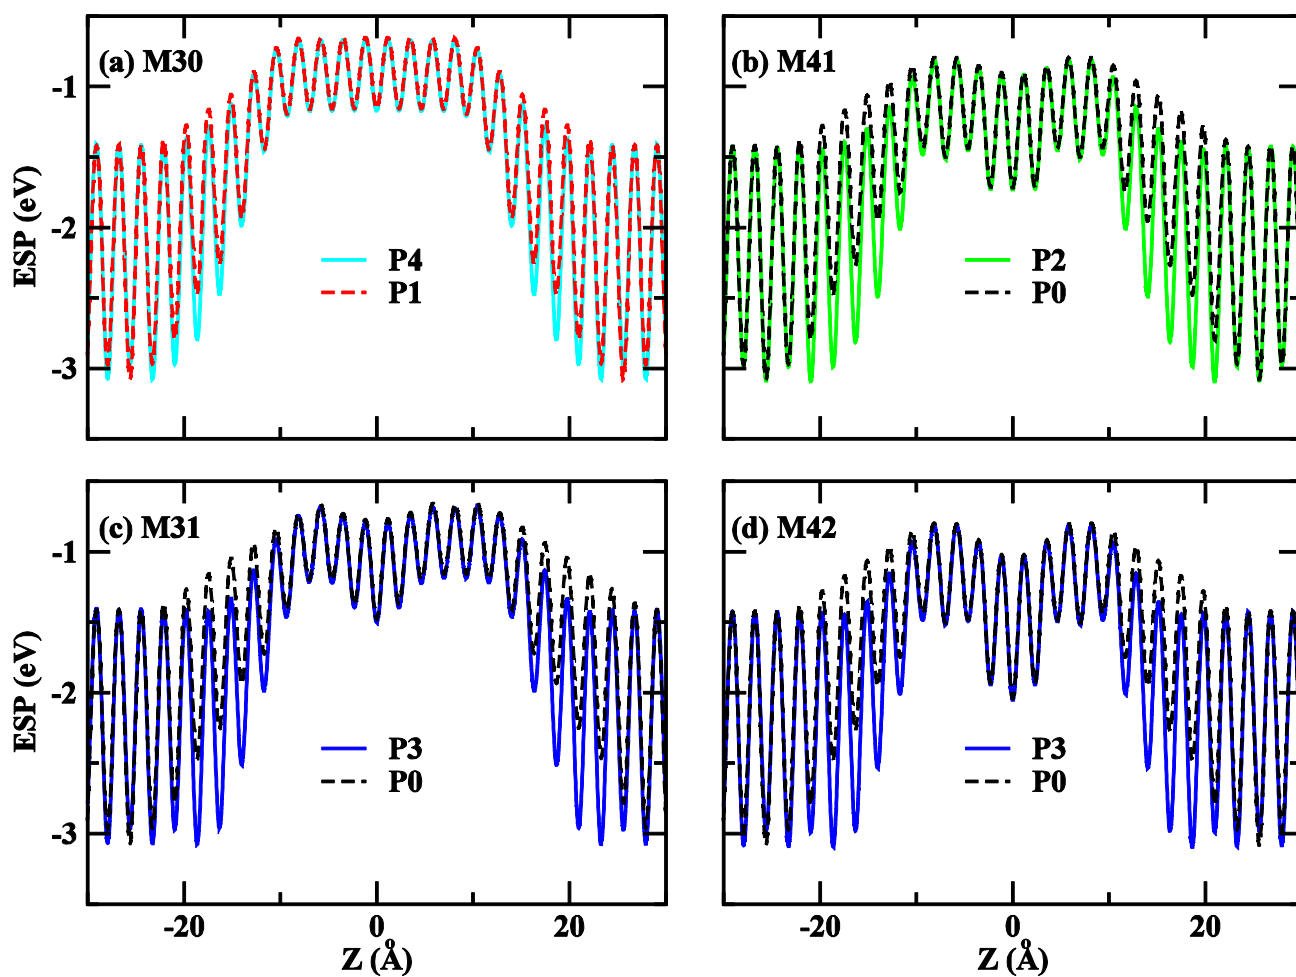

Fig. S2 Plane-averaged electrostatic potential for (a)  $S_{M30P4}$ ,  $S_{M30P1}$ ; (b)  $S_{M41P2}$ ,  $S_{M41P0}$ ; (c)  $S_{M31P3}$ ,  $S_{M31P0}$ ; (d)  $S_{M42P3}$ ,  $S_{M42P0}$ . The colors for each model correlate with those in Fig. 1.

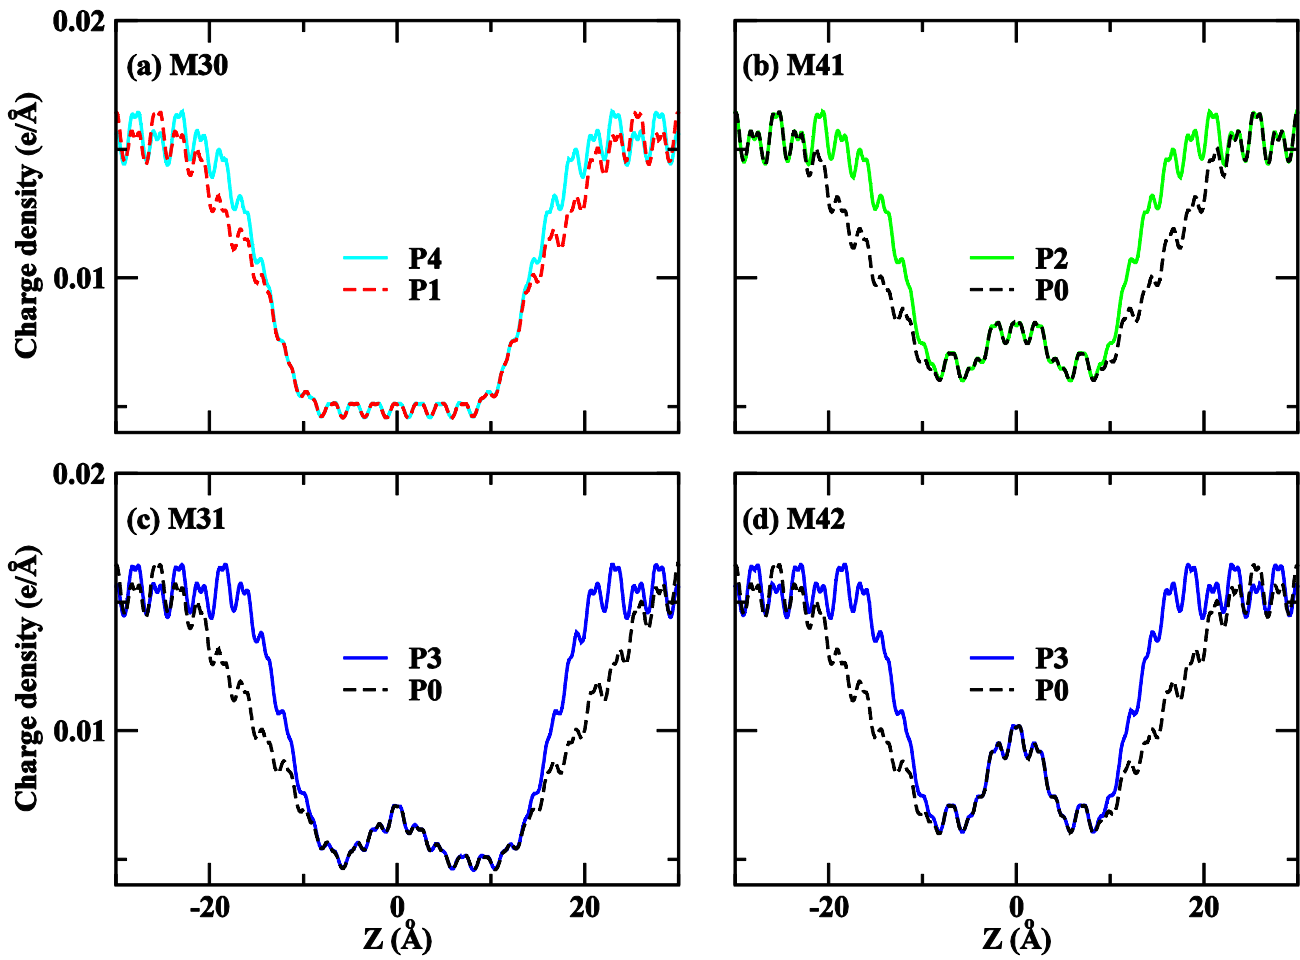

Fig. S3 Plane-averaged charge density for (a)  $S_{M30P4}$ ,  $S_{M30P1}$ ; (b)  $S_{M41P2}$ ,  $S_{M41P0}$ ; (c)  $S_{M31P3}$ ,  $S_{M31P0}$ ; (d)  $S_{M42P3}$ ,  $S_{M42P0}$ . The colors for each model correlate with those in Fig. 1.

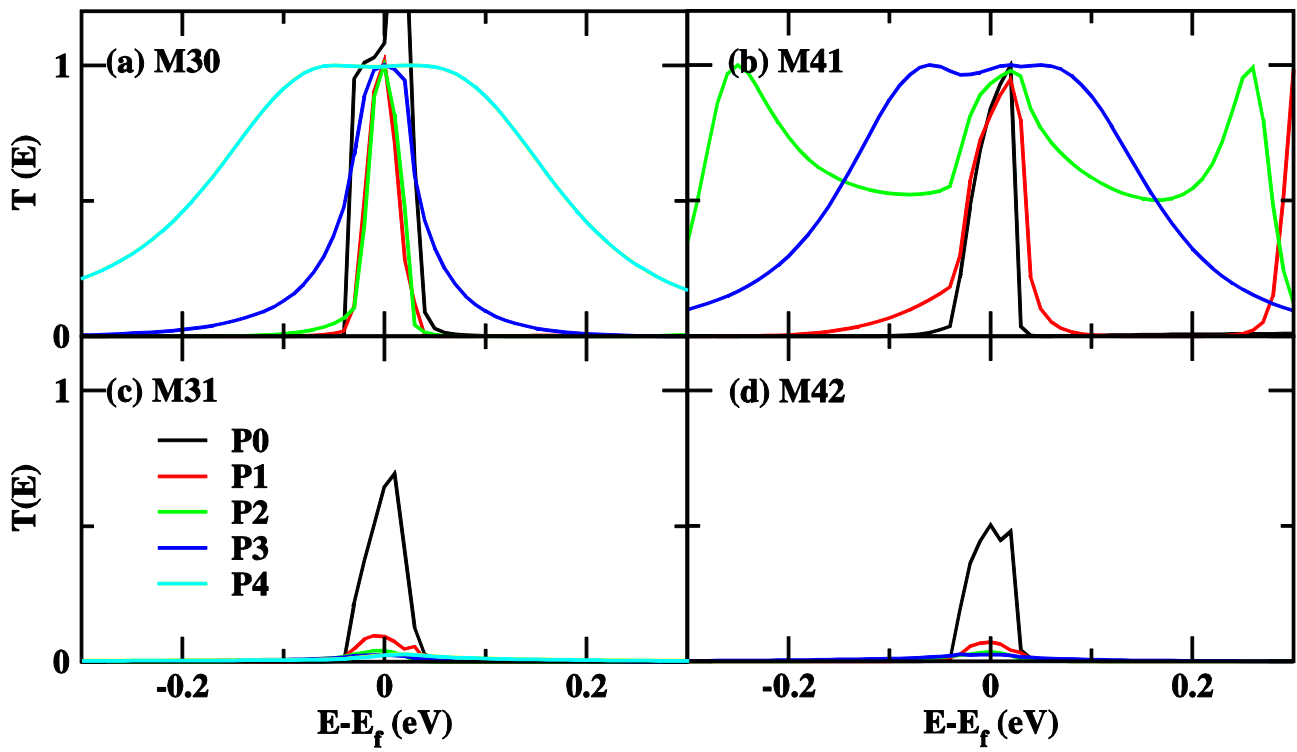

Fig. S4 Position dependent transmission spectra of (a)  $S_{M30Pq}$ ; (b)  $S_{M41Pq}$ ; (c)  $S_{M31Pq}$ , and (d)  $S_{M42Pq}$ . ZGNR with 11 zigzag chains (ZGNR-11) serves as the electrode.

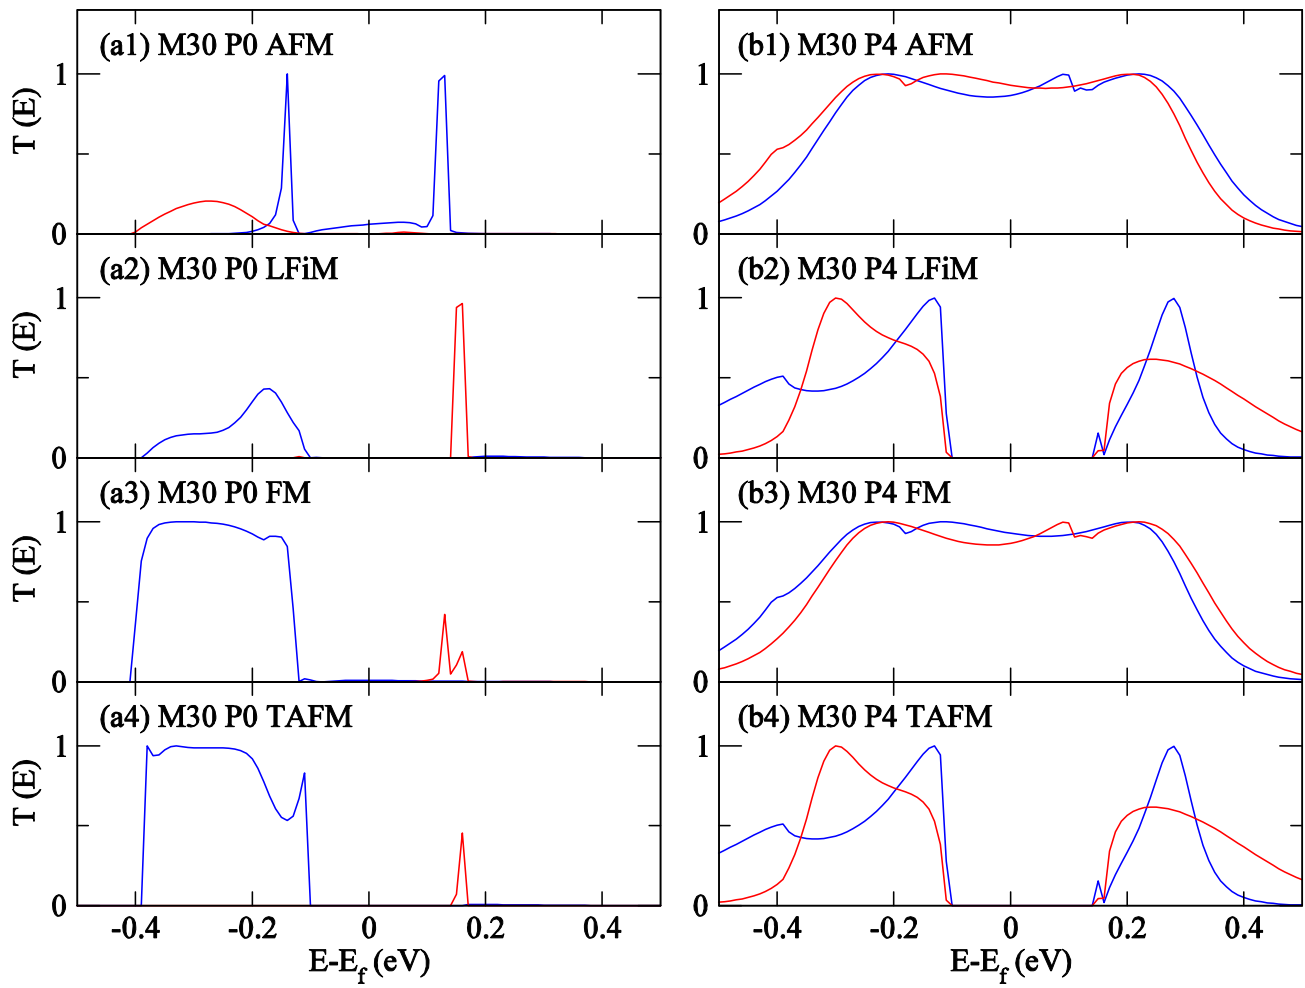

Fig. S5 Transmission for M30 at two positions: (a1)-(a4) $S_{M30P0}$ ; (b1)-(b4) $S_{M30P4}$ . Antiferromagnetic (AFM), longitudinal-ferrimagnetic (LFiM), ferromagnetic (FM), and trans-antiferromagnetic (TAFM) configurations are considered at each position, following ref [1].

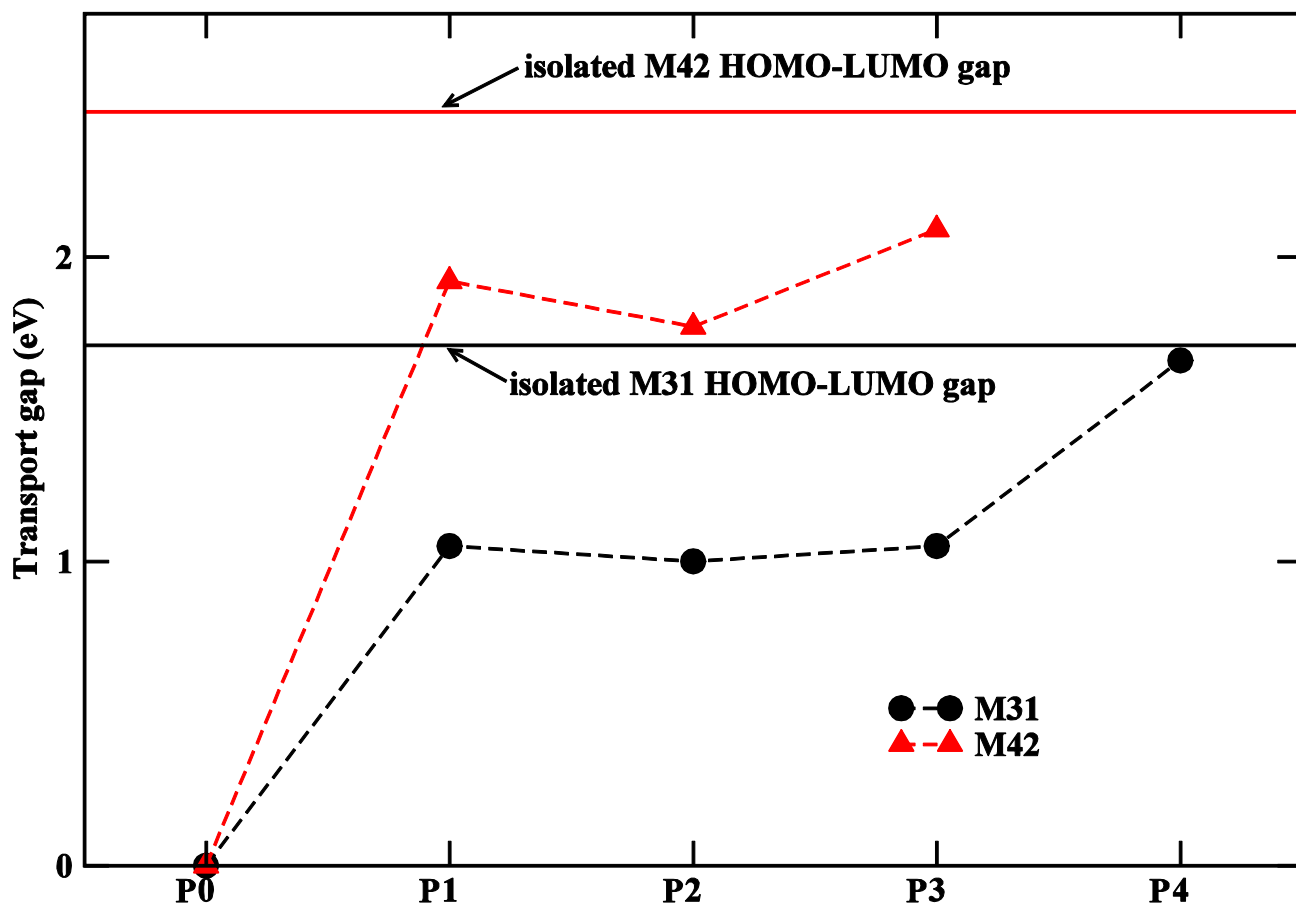

Fig. S6 Transport gap for M31 and M42 at different positions. The straight lines are guides for the eye.

[1] E. C. Girão, E. Cruz-Silva, L. Liang, A. G. Souza Filho and V. Meunier, *Phys. Rev. B*, 2012, **85**, 235431.
